# Supplementary material for: Genetic Variation in the Vascular Endothelial Growth Factor (VEGFA) Gene at rs13207351 Is Associated with Overall Survival of Patients with Head and Neck Cancer
Source: PubMed Central journal article supplement (PMC7962814; doi:10.3390/cancers13051163), 2021-03-08
Supplement: cancers-13-01163-s001.pdf [file cancers-13-01163-s001.pdf]

Supplementary Materials

## Genetic Variation in the *Vascular Endothelial Growth Factor (VEGFA)* Gene at rs13207351 Is Associated with Worse Overall Survival of Patients with Head and Neck Cancer

Foteinos-Ioannis Dimitrakopoulos, Georgia-Angeliki Koliou, Vassiliki Kotoula, Kyriaki Papadopoulou, Konstantinos Markou, Konstantinos Vlachtsis, Nikolaos Angouridakis, Ilias Karasmanis, Angelos Nikolaou, Amanda Psyri, Anastasios Visvikis, Paris Kosmidis, George Fountzilias and Angelos Koutras

**Table S1.** Hazard ratios and 95% CIs estimated by univariate Cox regression analysis under additive genetic models for all examined variants in NPC and non-NPC patients (with tumors located in the larynx).

| Variant                         | NPC Patients |                  |              | non-NPC Patients |                   |         |
|---------------------------------|--------------|------------------|--------------|------------------|-------------------|---------|
|                                 | Event/Total  | HR (95% CI)      | p-Value      | Event/Total      | HR (95% CI)       | p-Value |
| <b>NBS1 rs1805794 (p.E185Q)</b> |              |                  | 0.605        |                  |                   | 0.730   |
| C                               | 3/15         | 0.58 (0.17-2.00) | 0.387        | 10/21            | 1.33 (0.65-2.73)  | 0.433   |
| G                               | 13/44        | 1.10 (0.52-2.32) | 0.806        | 30/60            | 1.10 (0.67-1.82)  | 0.703   |
| GC                              | 15/63        | Reference        | --           | 31/67            | Reference         | --      |
| <b>EDNRA rs5333 (p.H323H)</b>   |              |                  | 0.809        |                  |                   | 0.728   |
| C                               | 0/5          | --               | --           | 4/6              | 1.33 (0.48-3.73)  | 0.585   |
| CT                              | 11/46        | 0.78 (0.38-1.63) | 0.515        | 26/58            | 0.89 (0.54-1.45)  | 0.640   |
| T                               | 21/70        | Reference        | --           | 41/83            | Reference         | --      |
| <b>EDNRA rs5334 (p.E335E)</b>   |              |                  | 0.855        |                  |                   | 0.728   |
| A                               | 0/4          | --               | --           | 4/6              | 1.33 (0.48-3.73)  | 0.585   |
| AG                              | 11/46        | 0.81 (0.39-1.69) | 0.575        | 26/58            | 0.89 (0.54-1.45)  | 0.640   |
| G                               | 21/70        | Reference        | --           | 41/83            | Reference         | --      |
| <b>FAS rs1800682 (-670)</b>     |              |                  | 0.602        |                  |                   | 0.295   |
| A                               | 9/28         | 1.22 (0.55-2.68) | 0.621        | 19/40            | 1.30 (0.74-2.29)  | 0.366   |
| AG                              | 20/79        | Reference        | --           | 32/74            | Reference         | --      |
| G                               | 2/14         | 0.56 (0.13-2.40) | 0.434        | 20/34            | 1.54 (0.88-2.70)  | 0.128   |
| <b>FAS rs2234768 (-690)</b>     |              |                  |              |                  |                   | 0.171   |
| C                               | --           | --               | --           | 1/1              | 3.97 (0.54-29.19) | 0.175   |
| CT                              | 8/20         | 2.22 (0.98-5.00) | <b>0.056</b> | 9/27             | 0.64 (0.32-1.29)  | 0.215   |
| T                               | 23/101       | Reference        | --           | 61/120           | Reference         | --      |
| <b>VEGFA rs699947 (-2578)</b>   |              |                  | 0.136        |                  |                   | 0.890   |
| A                               | 3/18         | 1.04 (0.27-3.91) | 0.959        | 11/20            | 1.19 (0.58-2.42)  | 0.636   |
| AC                              | 18/51        | 2.17 (0.94-4.99) | 0.069        | 35/72            | 1.08 (0.65-1.80)  | 0.774   |
| C                               | 8/48         | Reference        | --           | 25/56            | Reference         | --      |
| <b>VEGFA rs144854329</b>        |              |                  | 0.182        |                  |                   | 0.890   |
| het del18bp                     | 21/61        | 2.03 (0.61-6.81) | 0.251        | 35/72            | 0.91 (0.46-1.79)  | 0.780   |
| hom del18bp                     | 7/41         | 1.00 (0.26-3.86) | 0.998        | 25/56            | 0.84 (0.41-1.72)  | 0.636   |
| reference                       | 3/18         | Reference        | --           | 11/20            | Reference         | --      |
| <b>VEGFA rs35864111</b>         |              |                  | 0.182        |                  |                   | 0.890   |

|                           |       |                  |       |        |                  |              |
|---------------------------|-------|------------------|-------|--------|------------------|--------------|
| het ins1bp                | 21/61 | 2.03 (0.61-6.81) | 0.251 | 35/72  | 0.91 (0.46-1.79) | 0.780        |
| hom ins1bp                | 7/41  | 1.00 (0.26-3.86) | 0.998 | 25/56  | 0.84 (0.41-1.72) | 0.636        |
| reference                 | 3/18  | Reference        | --    | 11/20  | Reference        | --           |
| <b>VEGFA rs833061</b>     |       |                  | 0.731 |        |                  | 0.134        |
| <b>(-1498)</b>            |       |                  |       |        |                  |              |
| C                         | 5/22  | 1.57 (0.48-5.15) | 0.458 | 12/31  | 1.20 (0.57-2.54) | 0.635        |
| CT                        | 11/47 | 1.38 (0.51-3.73) | 0.526 | 43/74  | 1.74 (0.98-3.08) | 0.060        |
| T                         | 6/34  | Reference        | --    | 16/43  | Reference        | --           |
| <b>VEGFA rs1570360</b>    |       |                  | 0.570 |        |                  | 0.865        |
| <b>(-1154)</b>            |       |                  |       |        |                  |              |
| A                         | 5/26  | 0.79 (0.26-2.36) | 0.672 | 29/60  | 0.90 (0.53-1.54) | 0.703        |
| G                         | 15/55 | 1.32 (0.58-3.03) | 0.512 | 17/35  | 1.05 (0.57-1.95) | 0.874        |
| GA                        | 9/39  | Reference        | --    | 25/53  | Reference        | --           |
| <b>VEGFA</b>              |       |                  | 0.294 |        |                  | <b>0.012</b> |
| <b>rs13207351 (-1190)</b> |       |                  |       |        |                  |              |
| A                         | 14/54 | 1.85 (0.71-4.82) | 0.207 | 40/68  | 2.21 (1.23-3.96) | <b>0.008</b> |
| AG                        | 9/27  | 2.23 (0.79-6.28) | 0.127 | 15/34  | 1.19 (0.59-2.41) | 0.624        |
| G                         | 9/39  | Reference        | --    | 16/46  | Reference        | --           |
| <b>VEGFA rs3025039</b>    |       |                  | 0.826 |        |                  | 0.504        |
| <b>(+936)</b>             |       |                  |       |        |                  |              |
| C                         | 21/83 | Reference        | --    | 48/103 | Reference        | --           |
| CT                        | 8/30  | 1.19 (0.53-2.70) | 0.670 | 17/34  | 1.18 (0.68-2.05) | 0.559        |
| T                         | 1/4   | 0.67 (0.09-4.96) | 0.691 | 6/10   | 1.61 (0.69-3.77) | 0.272        |

HR, hazard ratio; CI, confidence interval.

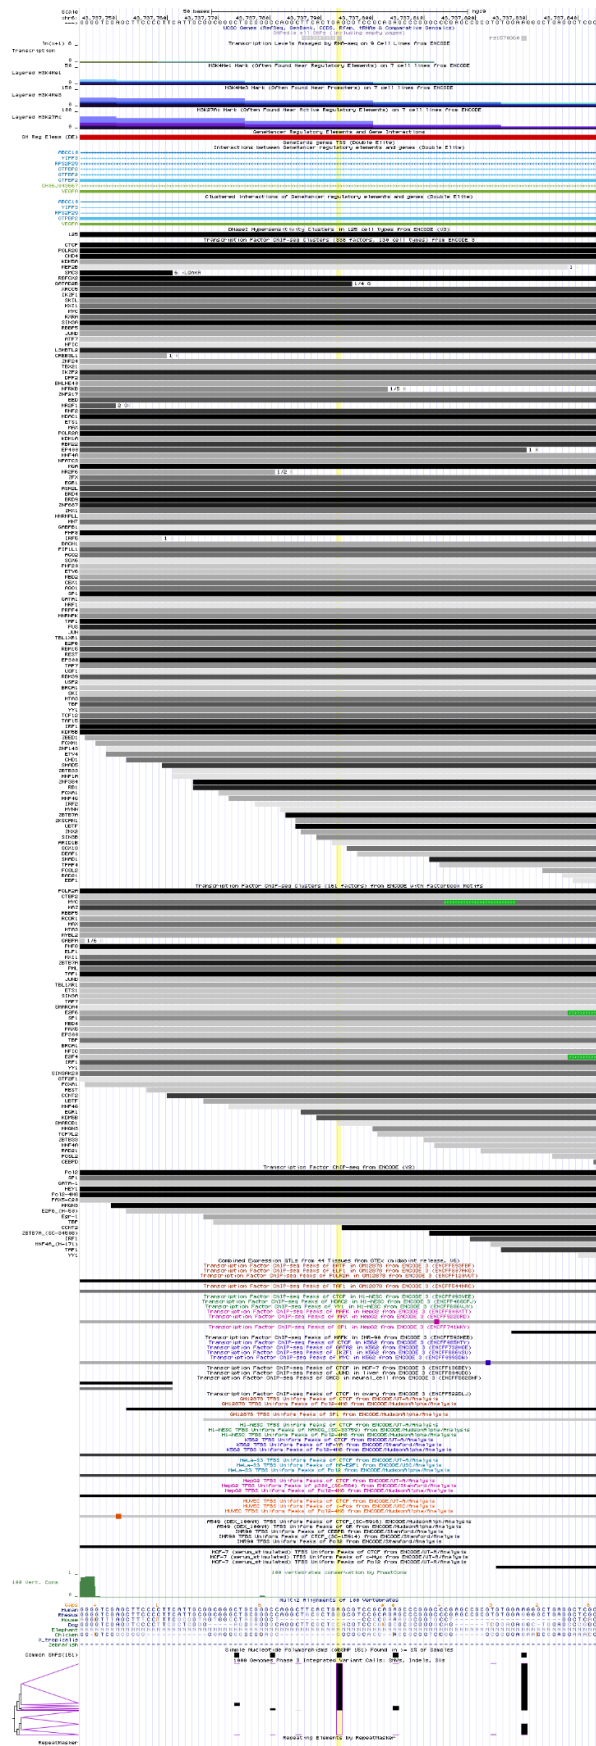

**Figure S1.** Analysis of regulatory element markers as well as transcription factor binding sites in loci associated with *VEGFA* rs13207351 from the UCSC Genome Browser (<http://ge-nome.ucsc.edu>, accessed on 15 February 2021) and ENCODE ([https://genome.ucsc.edu/cgi-bin/hgTracks?db=hg19&lastVirtMode-Type=default&lastVirtModeExtraState=&virtMode-Type=default&virtMode=0&nonVirtPosition=&position=chr6%3A43737744%2D43737844&hgside=1030849587\\_t7VZPWaPjrlzTTaw-dln/DOIGoT](https://genome.ucsc.edu/cgi-bin/hgTracks?db=hg19&lastVirtMode-Type=default&lastVirtModeExtraState=&virtMode-Type=default&virtMode=0&nonVirtPosition=&position=chr6%3A43737744%2D43737844&hgside=1030849587_t7VZPWaPjrlzTTaw-dln/DOIGoT), accessed on 15 February 2021).

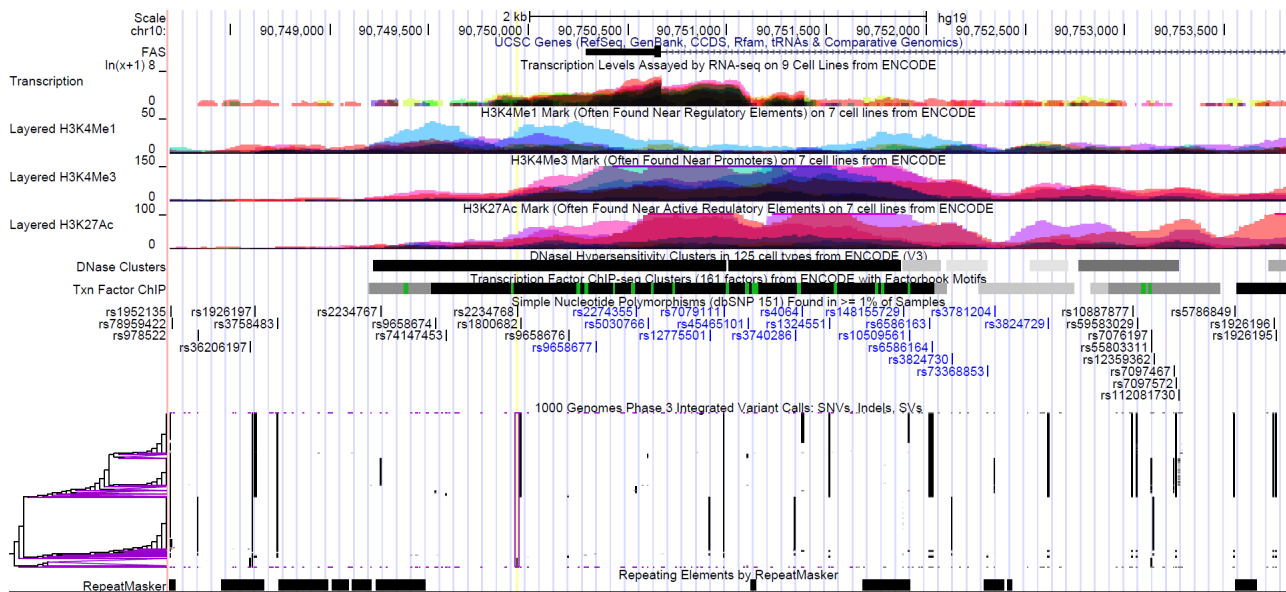

**Figure S2.** Analysis of regulatory element markers as well as transcription factor binding sites in genomic loci associated with *FAS* rs2234768 from the UCSC Genome Browser (<http://ge-nome.ucsc.edu>) and ENCODE ([https://genome.ucsc.edu/cgi-bin/hgTracks?db=hg19&lastVirtModeType=default&lastVirtModeExtraState=&virtModeType=default&virtMode=0&nonVirtPosition=&position=chr10%3A90748194%2D90753813&hgside=1030946669\\_QZu9OaqVBNaI1d5rluV4CLcRdd5q](https://genome.ucsc.edu/cgi-bin/hgTracks?db=hg19&lastVirtModeType=default&lastVirtModeExtraState=&virtModeType=default&virtMode=0&nonVirtPosition=&position=chr10%3A90748194%2D90753813&hgside=1030946669_QZu9OaqVBNaI1d5rluV4CLcRdd5q), accessed on 15 February 2021).
